# Supplementary material for: New, highly acidic ionic liquid systems and their application in the carbonylation of tolueneElectronic supplementary information (ESI) available: experimental details. See http://www.rsc.org/suppdata/cc/b4/b403464c/
Source: Royal Society of Chemistry journal article supplement (doi:10.1039/b403464c), 2004-01-01
Supplement: b403464c.doc [file b403464c.doc]

# SUPPLEMENTARY INFORMATION

New, highly acidic ionic liquid systems and their application in the carbonylation of toluene

Nicole Brausch,Andreas Metlen, Peter Wasserscheid*

Lehrstuhl für Chemische Reaktionstechnik der Universität Erlangen-Nürnberg, Egerlandstraße 3, 91058 Erlangen, Germany E-mail:.Wasserscheid@crt.cbi.uni-erlangen.de

Synthesis of the system *N*-butyl-4-methylpyridiniumbis(trifluoromethansulfonyl)imide / AlCl3 (1 / 2)

In a schlenk-flask the dried 1-n-butyl-4-methylpyridiniumbis(trifluoromethansulfonyl)imide (21,52 g, 50 mmol) was submitted. The corresponding amount of AlCl3 (100 mmol; 13,34 g) was added (under argon atmosphere) in portions to the ionic liquid and stirred. Heating up the mixture to 80° C accelerate the dissolution of the AlCl3 in the ionic liquid.

Spectral information about the system *N*-butyl-4-methylpyridiniumbis(trifluoromethansulfonyl)imide / AlCl3 (1 / 2)

Upper phase:

1H-NMR (300 MHz, C6D6)

δ = 0.56 (t, J=2.5 Hz, 3H,), 1.01 (hex, J=2.5 Hz, 2H,), 1.61 (quin, J=2.5 Hz, 2H), 2.29 (s, 3H), 4.10 (t, J=2.5 Hz, 2H), 7.45 (d, J=2.1 Hz, 2H), 8.04 (d, J=2.2 Hz, 2H) ppm.

13C-NMR (75 MHz, C6D6):

δ = 13.15, 19.22, 22.11, 33.03, 61,69, 118,39 (quar, J=4.3 MHz, CF3), 129,43, 142,68, 160,38 ppm

19F-NMR (280 MHz,C6D6)

 = -76,46 ppm

Lower phase

1H-NMR (300 MHz, DMSO):

δ = 3.78 ppm (s, H2O from the DMSO)

13C-NMR (75 MHz, DMSO):

δ = 117.40 (quar, J=4,2 MHz, CF3) ppm.

19F-NMR (280MHz, DMSO)

 = -79,10 (cA)

Experimental procedures for the carbonylation of toluene.

Toluene was distilled from Na prior to use. CO was used without further purification (Linde AG, quality 2.0). Standards of o-, m-, p-tolualdehyd were obtained from Fluka for GC calibration.

The reaction was carried out in a 75 cm³ autoclave, stirred with a cross-shaped magnetic stirring. During the filling procedure a constant argon atmosphere was maintained in the autoclave.

First the ionic liquid/AlCl3 mixture was filled into the autoclave using a syringe with steel needle. After that the toluene was filled in the autoclave with the same technique, it was pressurised with CO and heated up to 80° C. The reaction was started by turning on the stirrer. After two hours, the autoclave was depressurized and the reaction mixture was hydrolysed with water. A three-phasic system was obtained, the lower phase being the ionic liquid, the middle phase being the aqueous phase and the upper phase being the organic one. The phases were separated. The organic layer was washed with water and neutralised with sodium hydrogencarbonate. After drying overnight over MgSO4 , the organic phase was analysed with GC (50 m Cp-WAX-58-CB (FFAP).
